# Supplementary material for: Transformation of phenolic compounds upon UVA irradiation of anthraquinone-2-sulfonate
Source: Royal Society of Chemistry journal article supplement (doi:10.1039/b709331d), 2007-12-10
Supplement: b709331d.pdf [file b709331d.pdf]

## SUPPLEMENTARY MATERIAL

### TRANSFORMATION OF PHENOLIC COMPOUNDS UPON UVA IRRADIATION OF ANTHRAQUINONE-2-SULPHONATE

**Valter Maurino, Daniele Borghesi, Davide Vione and Claudio Minero\***

*Dipartimento di Chimica Analitica, Università di Torino, Via P. Giuria 5, 10125 Torino,  
Italy. <http://www.chimicadellambiente.unito.it>*

\* Corresponding author. Tel. +39-011-6707632; e-mail: [claudio.minero@unito.it](mailto:claudio.minero@unito.it)

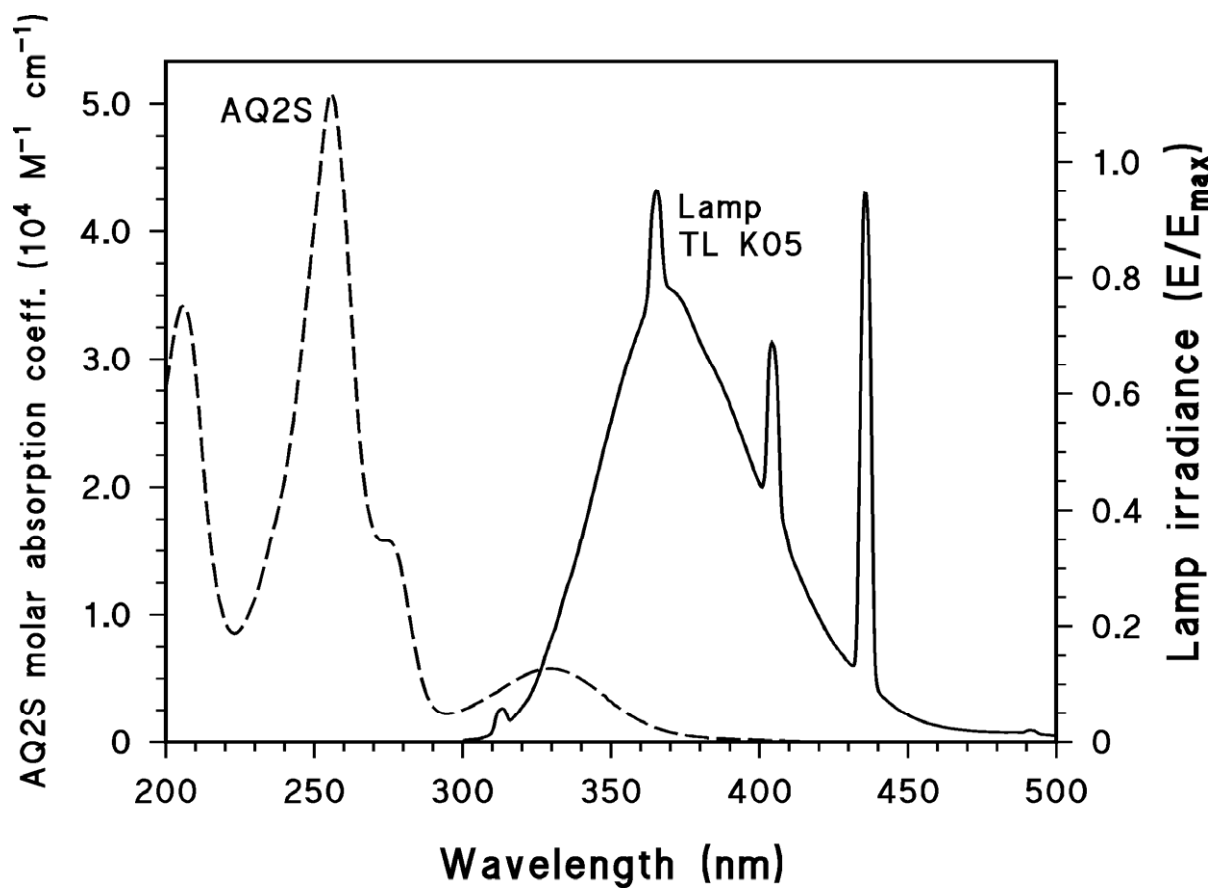

**Figure S1.** Absorption spectrum of AQ2S (molar absorption coefficient). Emission spectrum of the Philips TL K05 lamps (lamp irradiance maximum at 365 nm).

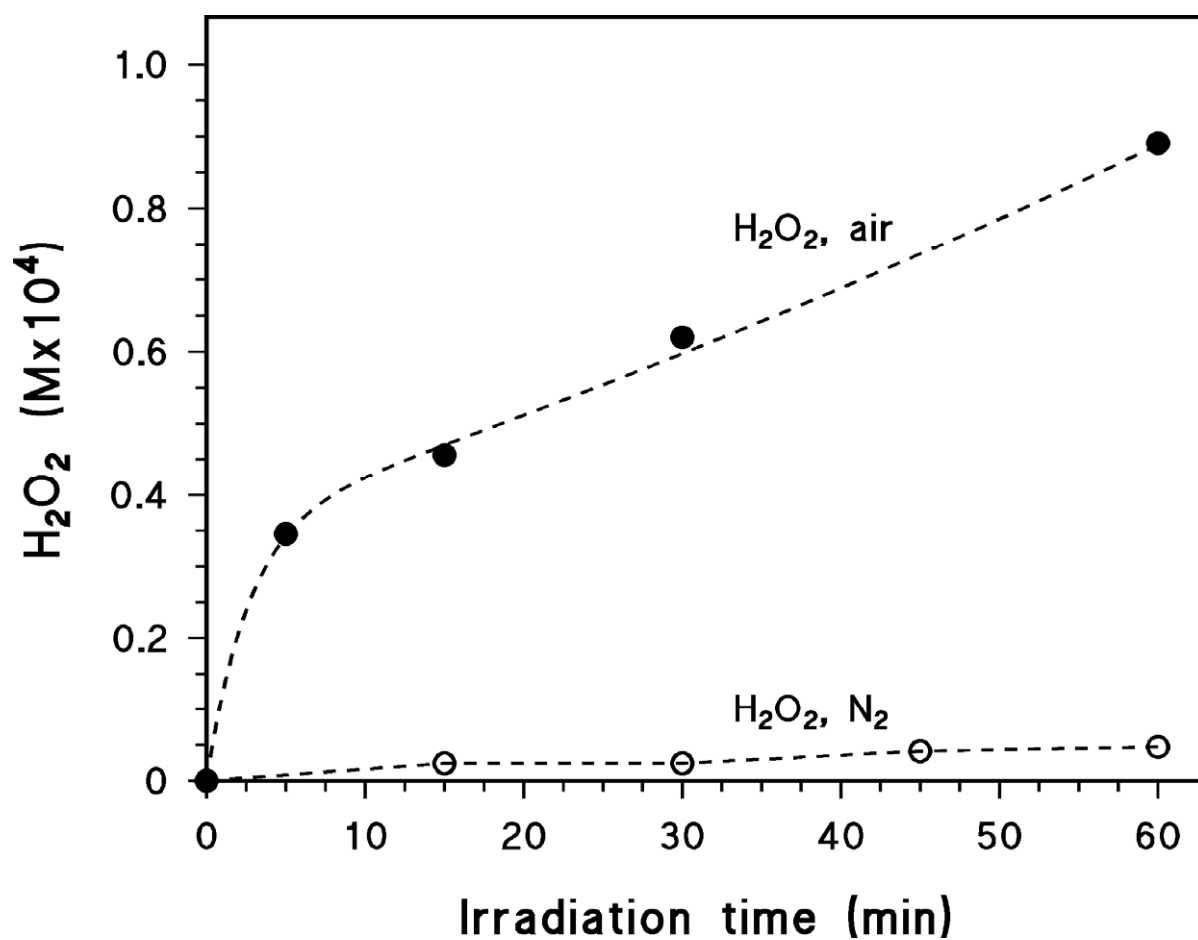

**Figure S2.** Time evolution of hydrogen peroxide in the presence of  $2.0 \times 10^{-5}$  M phenol +  $1.0 \times 10^{-3}$  M AQ2S in aerated and in deoxygenated solution. Irradiation under TL K05 lamps.
